# Supplementary material for: Silicon based mid-IR super absorber using hyperbolic metamaterial
Source: PubMed Central journal article supplement (PMC5794863; doi:10.1038/s41598-017-18737-5), 2018-02-01
Supplement: 41598_2017_18737_MOESM1_ESM.pdf [file 41598_2017_18737_MOESM1_ESM.pdf]

Supplementary Information:

**Silicon based mid-IR super absorber using hyperbolic  
metamaterial**

Mai Desouky<sup>1</sup>, Ahmed M. Mahmoud<sup>1,2</sup>, Mohamed A. Swillam\*<sup>1</sup>,

<sup>1</sup>Department of Physics, The American University in Cairo, Cairo, 11835, Egypt

<sup>2</sup>Electronics and Communications Engineering Department, The American University in Cairo, Cairo, 11835, Egypt

\*Corresponding author: [m.swillam@aucegypt.edu](mailto:m.swillam@aucegypt.edu)

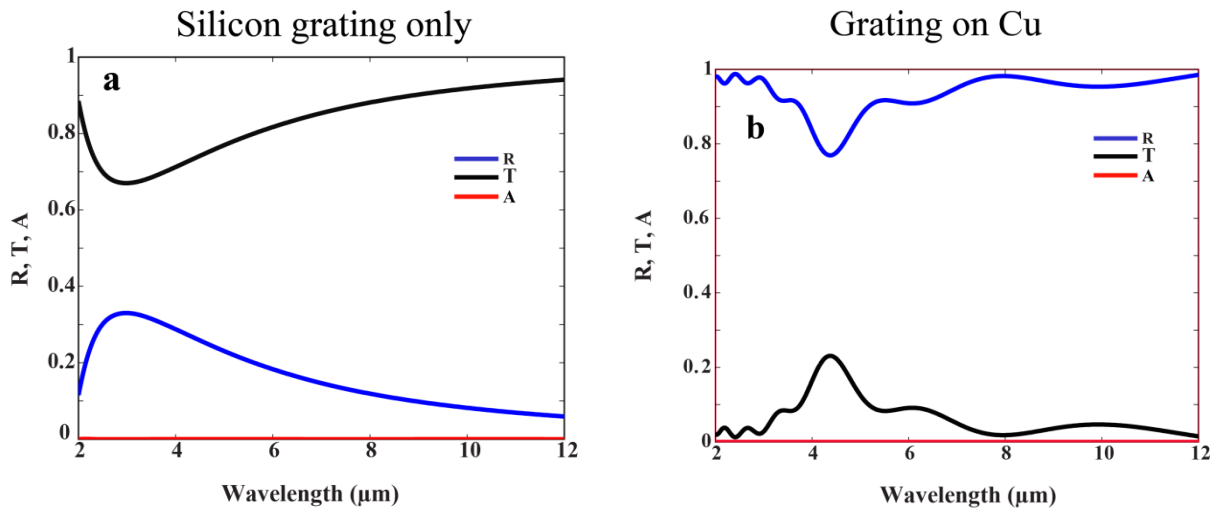

**Figure S1: Reflection (R), Transmission (T) and absorption (A) spectrum.** for a) Silicon hole grating only and b) Silicon grating on perfect reflector.

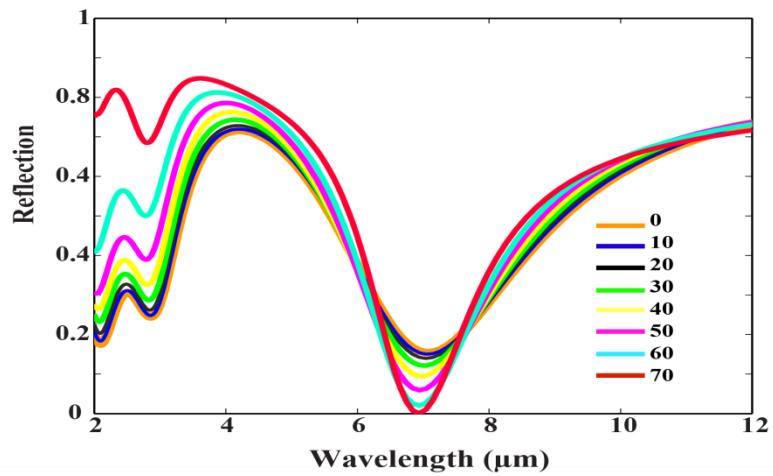

**Figure S2. Reflection spectrum for uniform hole grating on HMM.** Different angles of incidence from 0 to 70 degrees

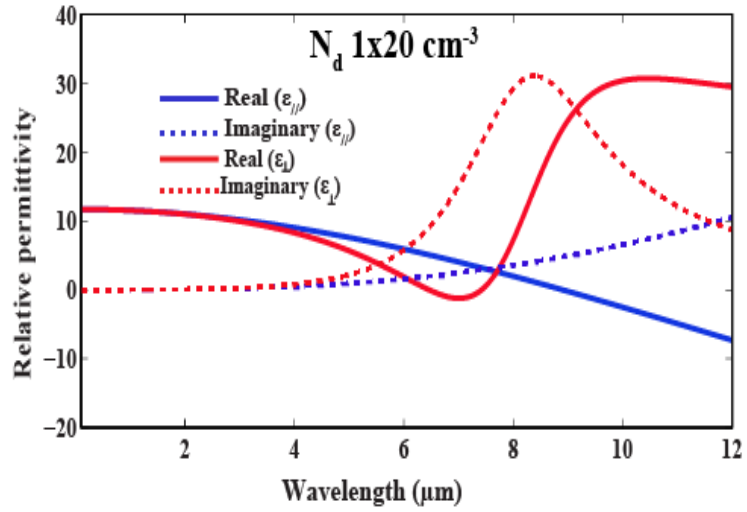

Figure S3. Dispersion relation for doped Si/Si HMM.  $N_d$  of  $1 \times 10^{20} \text{ cm}^{-3}$ .

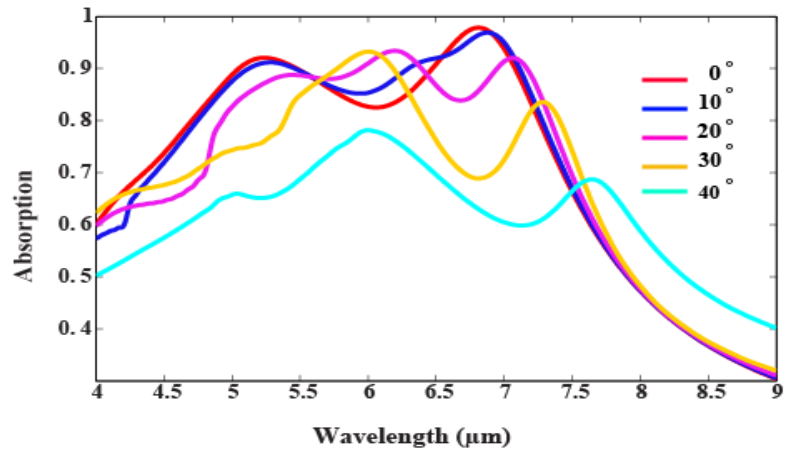

Figure S4. Broad band absorption for MHSG. Absorption for MHSG on N-doped Si/Si HMM at oblique incidence from 0 to 40 degrees.

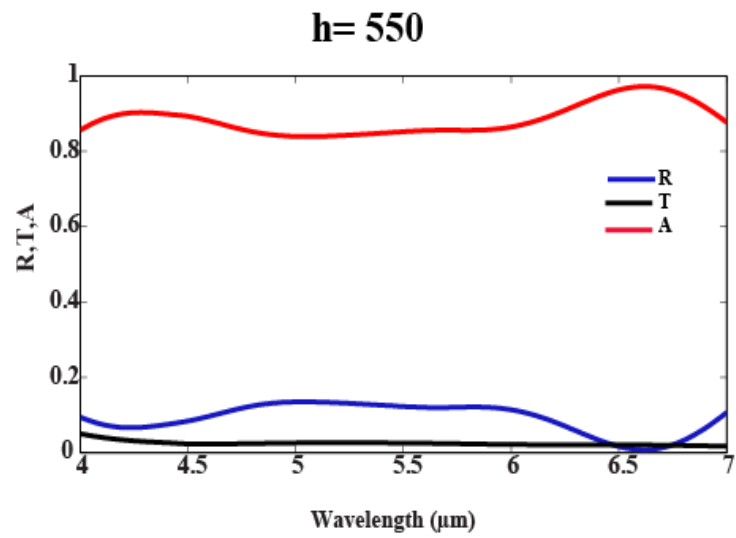

**Figure S5. Broad band absorption for MDSG.** R, T and A for MDSG on N-doped Si /Si HM at normal TM injection for grating of h 550 nm.
